# Supplementary material
Source: Springer Nature journal article supplement (https://www.springermedizin.de/resource/supplementary/12885_2013_4322_MOESM2_ESM.pdf/9465998)

InRML *GATA5*

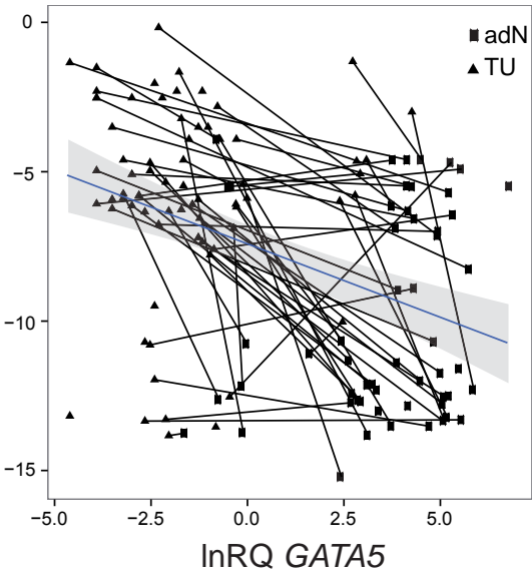

Supplement: MOESM2 [file 9465998]
